# Supplementary material for: Aim44p regulates phosphorylation of Hof1p to promote contractile ring closure during cytokinesis in budding yeast
Source: PubMed Central journal article supplement — Mol Biol Cell. 2014 Mar 15;25(6):753–62. doi: 10.1091/mbc.E13-06-0317 (PMC3952846; doi:10.1091/mbc.e13-06-0317), 2014-03-15

# Supplemental Materials

*Molecular Biology of the Cell*

Alessi Wolken et al.

## **SUPPLEMENTAL FIGURE LEGENDS**

**Supplemental Figure 1:** Aim44p-GFP is a functional fusion protein. The fusion of a C-terminal GFP tag to Aim44p does not produce a multibudded phenotype in cells in late-log phase liquid culture (SC), indicating that the tag does not interrupt its normal function in promoting cell division. The percentage of multibudded cells in the Aim44p-GFP expressing cells is not statistically different from wild-type cells ( $p = 0.9$ , Student's t-test). *aim44Δ* cells are multibudded compared to wild-type and Aim44p-GFP expressing cells ( $p = .0085$  and  $p = 0.01$ , respectively, Student's t-test). Error bars represent standard deviation of 3 independent experiments.  $n \geq 100$  cells for each strain in each independent experiment.

**Supplemental Figure 2:** Localization of Cdc3p-mCherry and Myo1p-GFP during cell division in wild-type cells. Cells expressing *MYO1* tagged with GFP at its chromosomal locus and plasmid-borne Cdc3p-mCherry were grown to mid-log phase and imaged by fluorescence microscopy. Deconvolved projections of representative images of Cdc3p-mCherry (red) and Myo1p-GFP (green) at the bud neck of cells with small, medium, and large buds (**a-c**, respectively) and separated mother and daughter cells (**d**). (**a**) Myo1p co-localizes with a single septin ring in a small-budded cell. (**b-c**) In cells bearing medium to large buds, the septin ring thickens and forms 2 rings that surround the single Myo1p ring. (**d**) After contractile ring closure and cell separation, mother and daughter cell each have a single septin ring. Scale bar = 0.3  $\mu\text{m}$ .

**Supplemental Figure 3:** (A) *aim44Δ* yeast expressing a plasmid-borne septin, Cdc3p-mCherry (red), were grown to mid-log phase and imaged by fluorescence microscopy. Cdc3p-mCherry forms single and double rings in *aim44Δ* cells. (B) Myo1p is not required for localization of Aim44p to a ring at the bud neck. *myo1Δ* cells in which *AIM44* was tagged with GFP at its chromosomal locus were grown in SC to mid-log phase and imaged by fluorescence microscopy. Deletion of *MYO1* did not prevent localization of Aim44p-GFP to the bud neck. Scale bar = 1  $\mu\text{m}$ .

**Supplemental Figure 4:** The lower-mobility band containing Hof1p-13Myc is due to phosphorylation of the protein. Wild-type and *aim44Δ* cells expressing Hof1p tagged with 13Myc at its chromosomal locus were synchronized as for Figure 1. An aliquot was removed 90 min after release from  $G_1$  arrest for extraction of protein. Half of the protein sample was left untreated and the other half was treated with 10 units of calf intestinal alkaline phosphatase (CIP) for 1 hr at 37°C. Western blots are shown in which Hof1p was detected using anti-Myc antibody and the load control, hexokinase, was detected using a polyclonal anti-hexokinase antibody. \*, lower mobility band(s) of Hof1p-13Myc. The lower mobility Hof1p-13Myc band(s) is phosphorylated, as measured by sensitivity to CIP treatment.

**Supplemental Figure 5:** Deletion of *AIM44* inhibits cytokinesis but does not affect rates of cell cycle progression. Cell cycle progression was analyzed by quantifying spindle length every 15 min for 90 min after release from pheromone-induced arrest in  $G_1$  phase in wild-type and *aim44Δ* cells expressing tubulin tagged at its C-terminus with GFP. Cells were fixed using paraformaldehyde and stained with the DNA-binding dye DAPI and imaged. These data are pooled from two independent experiments and measurements average  $n \geq 100$  cells per strain. Error bars represent standard error of the mean.

**Supplemental Table 1:** Yeast strains used in this study were constructed as described in the Methods section. All yeast strains were created in the *BY4741* wild-type background except for the temperature-sensitive septin strain (*YEF743 cdc12-6*) and the wild-type control (*YEF6866 CDC12*). The two *YEF* strains were kindly provided by Dr. Erfei Bi.

| Strain   | Genotype                                                                                | Source                                  |
|----------|-----------------------------------------------------------------------------------------|-----------------------------------------|
| BY4741   | <i>MATa his3Δ1 leu2Δ0 met15Δ0 ura3Δ0</i>                                                | Open Biosystems (Huntsville, AL)        |
| 7394     | <i>MATa aim44Δ::kanMX6 his3Δ1 leu2Δ0 met15Δ0 ura3Δ0</i>                                 | Open Biosystems                         |
| ISY007   | <i>MATa cbk1Δ::HIS3 leu2Δ0 met15Δ0 ura3Δ0</i>                                           | (García-Rodríguez <i>et al.</i> , 2009) |
| THY158   | <i>MATa MYO1-GFP::HIS3 leu2Δ0 met15Δ0 ura3Δ0</i>                                        | (Huckaba <i>et al.</i> , 2006)          |
| RHY045   | <i>MATa his3Δ1 myo1Δ::LEU2 met15Δ0 ura3Δ0</i>                                           | (Higuchi <i>et al.</i> , 2013)          |
| DAY001   | <i>MATa aim44Δ::kanMX6 his3Δ1 leu2Δ0 met15Δ0 ura3Δ0</i><br>[pYIP128-CDC3-mCherry::LEU2] | This study                              |
| DAY002   | <i>MATa MYO1-GFP::HIS3 aim44Δ::kanMX6 leu2Δ0 met15Δ0 ura3Δ0</i>                         | This study                              |
| DAY003   | <i>MATa AIM44-GFP::HIS3 leu2Δ0 met15Δ0 ura3Δ0</i>                                       | This study                              |
| DAY004   | <i>MATa AIM44-GFP::HIS3 leu2Δ0 met15Δ0 ura3Δ0</i><br>[pYIP128-CDC3-mCherry::LEU2]       | This study                              |
| DAY005   | <i>MATa AIM44-GFP::HIS3 myo1Δ::LEU2 met15Δ0 ura3Δ0</i>                                  | This study                              |
| DAY006   | <i>MATa AIM44-GFP::HIS3 MYO1-mCherry::hphMX4 leu2Δ0 met15Δ0 ura3Δ0</i>                  | This study                              |
| DAY007   | <i>MATa MYO1-GFP::HIS3 CDC3-mCherry::hphMX4 leu2Δ0 met15Δ0 ura3Δ0</i>                   | This study                              |
| DAY008   | <i>MATa HOF1-13Myc::HIS3 leu2Δ0 met15Δ0 ura3Δ0</i>                                      | This study                              |
| DAY009   | <i>MATa HOF1-13Myc::HIS3 aim44Δ::LEU2 met15Δ0 ura3Δ0</i>                                | This study                              |
| LPY057-1 | <i>MATa HOF1-GFP::HIS3 leu2Δ0 met15Δ0 ura3Δ0</i>                                        | This study                              |
| DAY010   | <i>MATa aim44Δ::KANMX6 HOF1-GFP::HIS3 met15Δ0 ura3Δ0</i>                                | This study                              |
| DAY011   | <i>CDC12+ AIM44-GFP::KanMX6 ura3 leu2Δ0 HIS3+ TRP1+</i><br>[pYIP128-CDC3-mCherry::LEU2] | This study                              |

| Strain | Genotype                                                                              | Source     |
|--------|---------------------------------------------------------------------------------------|------------|
| DAY012 | <i>cdc12-6 AIM44-GFP::KanMX6 ura3 leu2Δ0 HIS3+ TRP1+ [pYIP128-CDC3-mCherry::LEU2]</i> | This study |
| DAY013 | <i>MATa his3Δ1 TUB1-GFP::LEU2 met15Δ0 ura3Δ0</i>                                      | This study |
| DAY014 | <i>MATa aim44Δ::kanMX6 his3Δ1 TUB1-GFP::LEU2 met15Δ0 ura3Δ0</i>                       | This study |
| DAY015 | <i>MATa his3Δ1 leu2Δ0 met15Δ0 ura3Δ0 [pGB1805-DBF2::URA3]</i>                         | This study |
| DAY016 | <i>MATa aim44Δ::kanMX6 his3Δ1 leu2Δ0 met15Δ0 ura3Δ0 [pGB1805-DBF2::URA3]</i>          | This study |
| DAY017 | <i>MATa AIM44-3HA::kanMX6 his3Δ1 leu2Δ0 met15Δ0 ura3Δ0</i>                            | This study |
| DAY018 | <i>MATa AIM44-3HA::kanMX6 HOF1-13Myc::HIS3 leu2Δ0 met15Δ0 ura3Δ0</i>                  | This study |

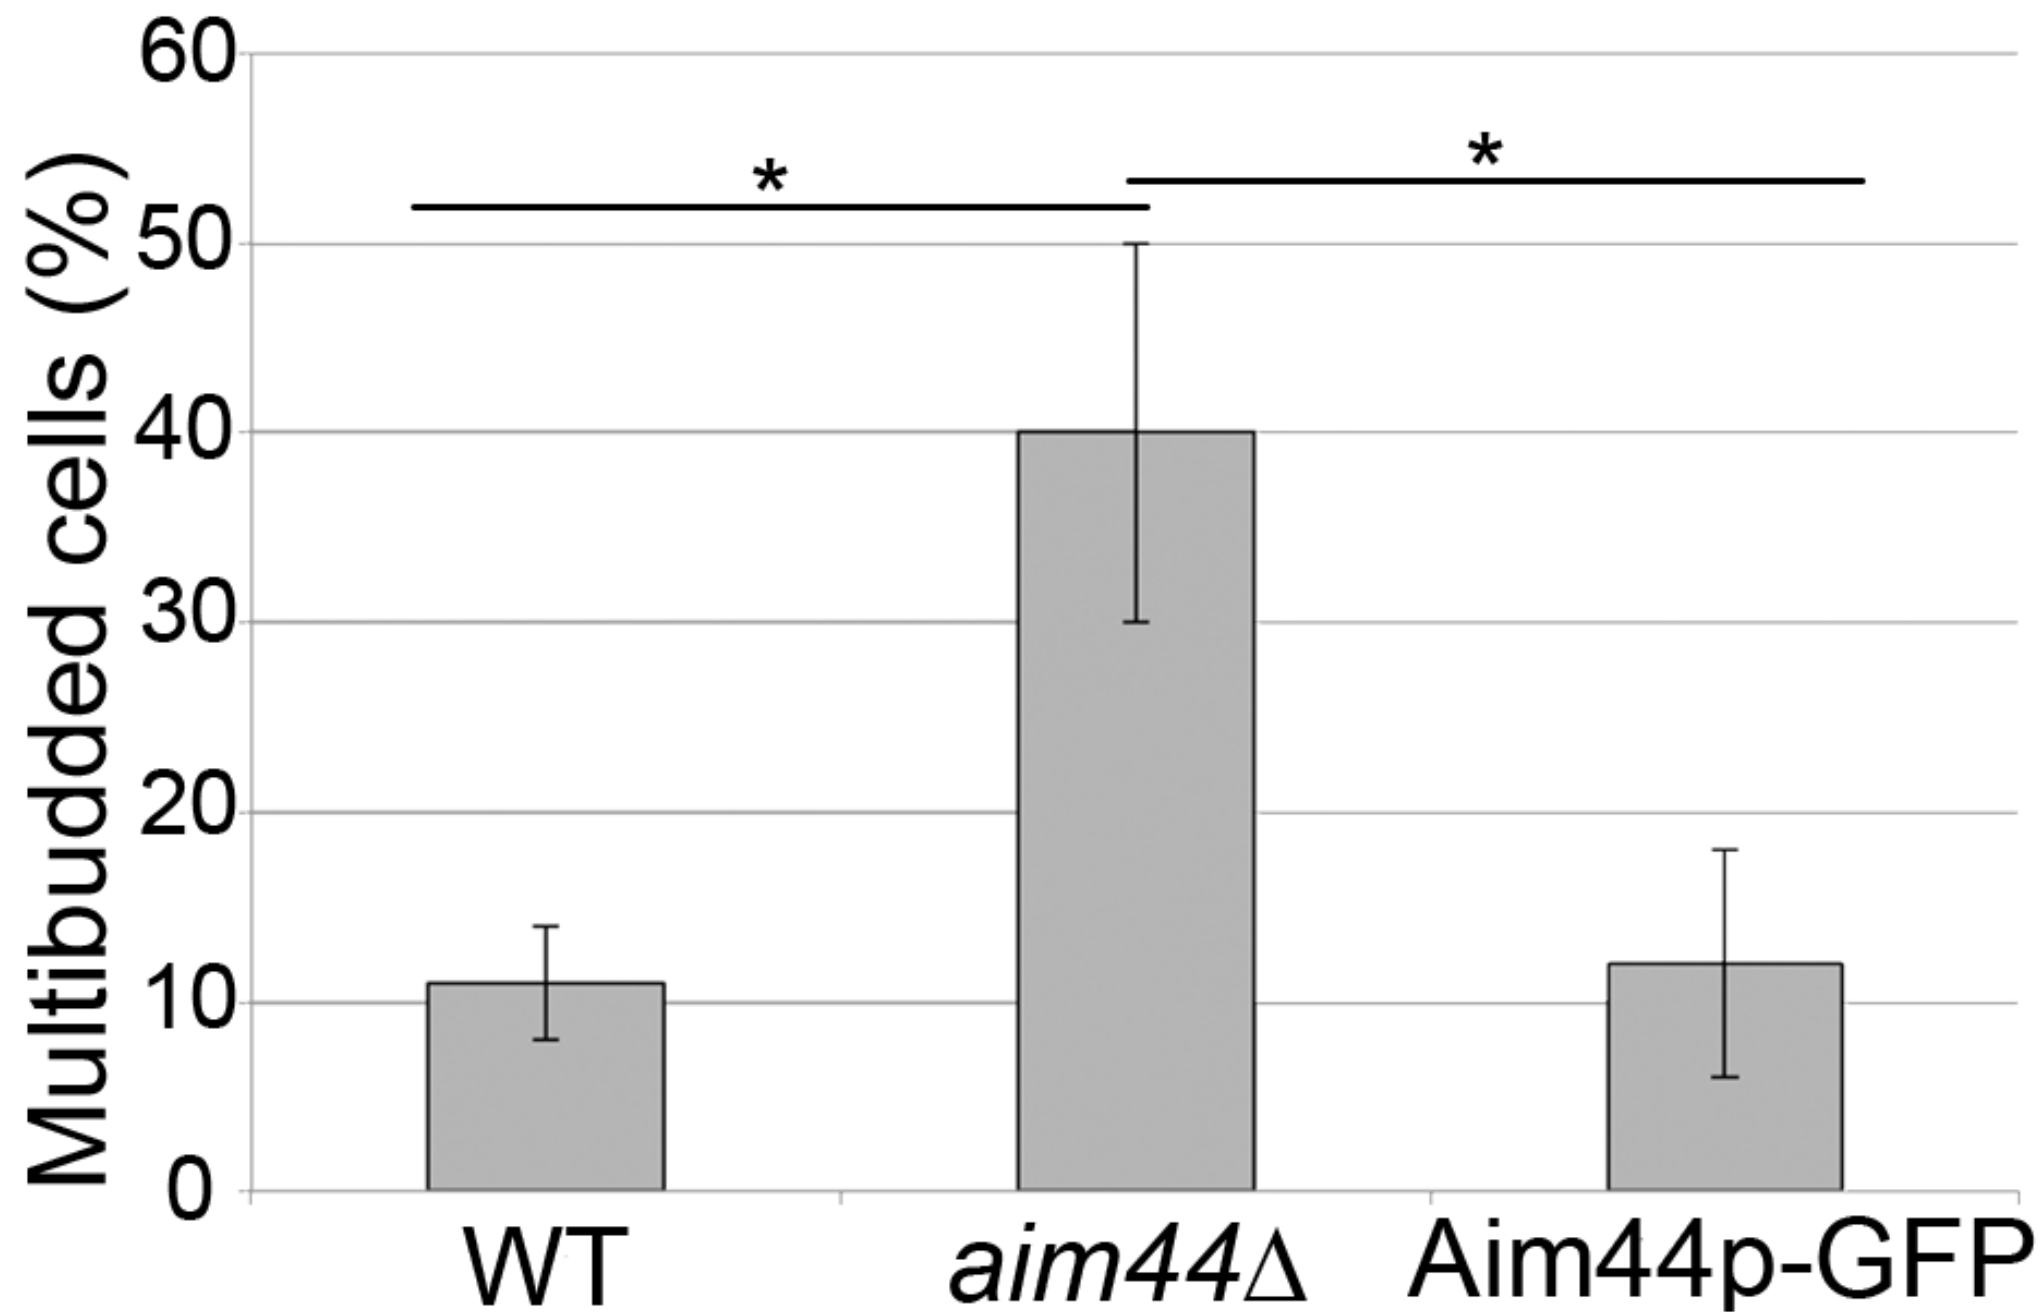

Cdc3p-mCherry Myo1p-GFP Merge

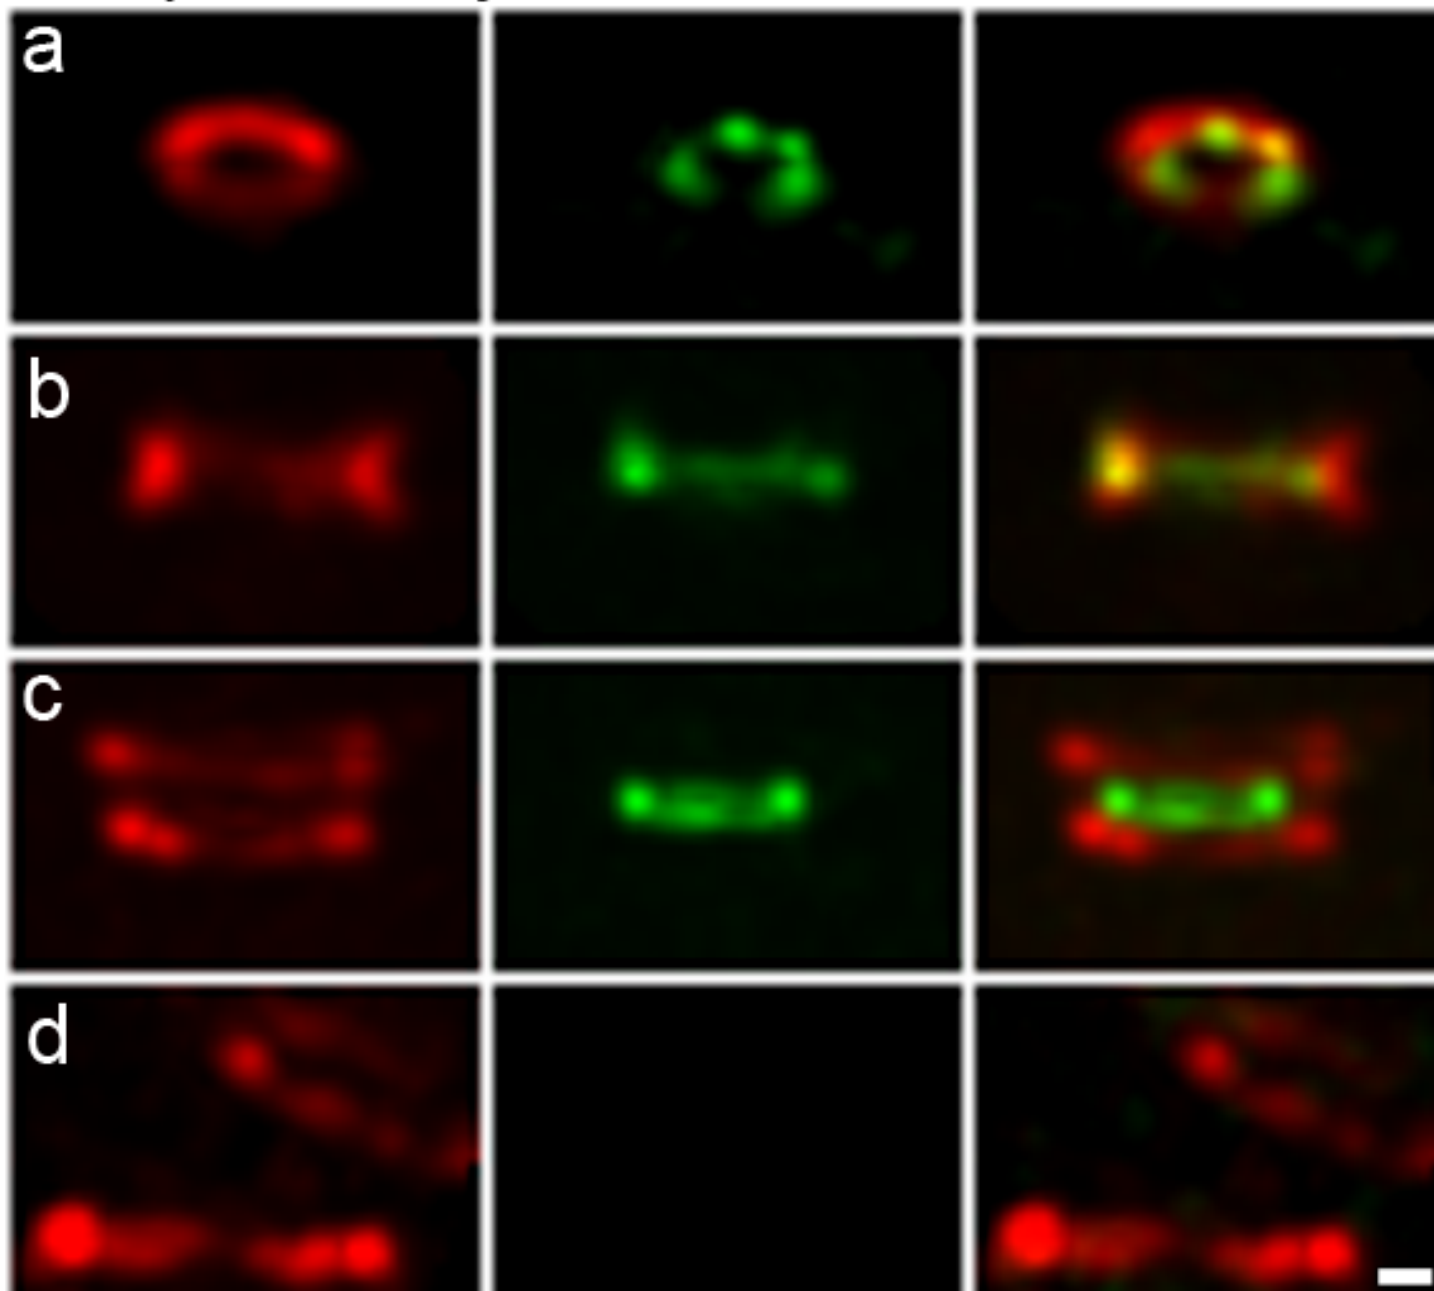

**A***aim44* $\Delta$  *Cdc3p-mCherry*

Single Ring

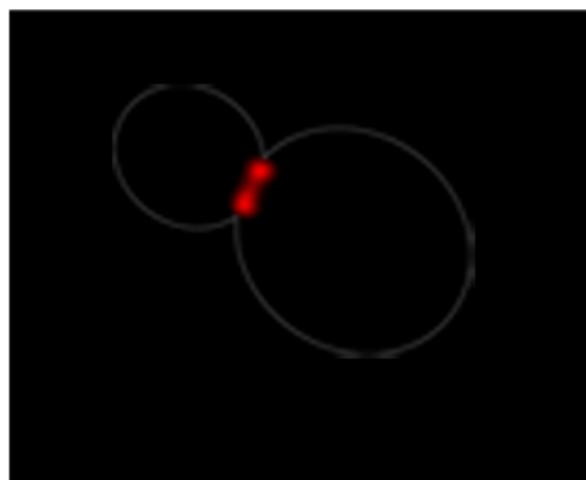

Double Ring

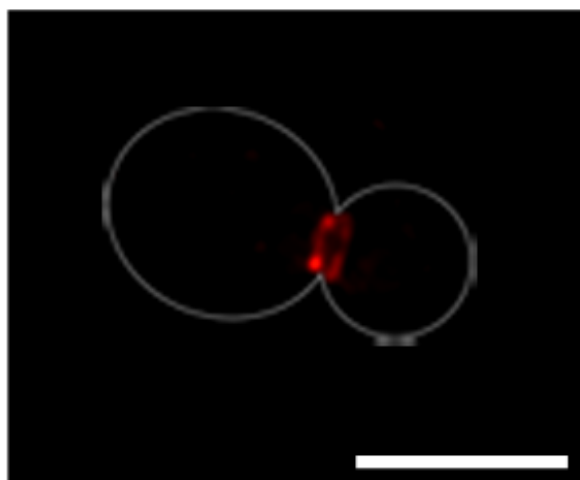**B***myo1* $\Delta$   
*Aim44p-GFP*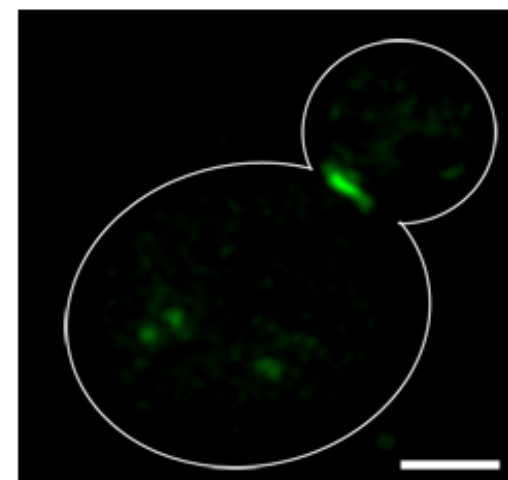

WT

90 min after release  
from arrest

CIP

-

+

Hof1 p-13Myc

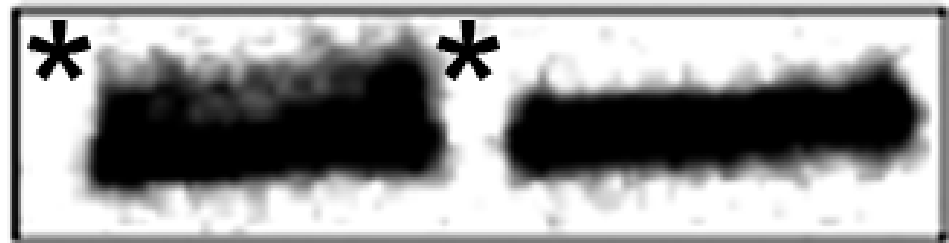

Hexokinase

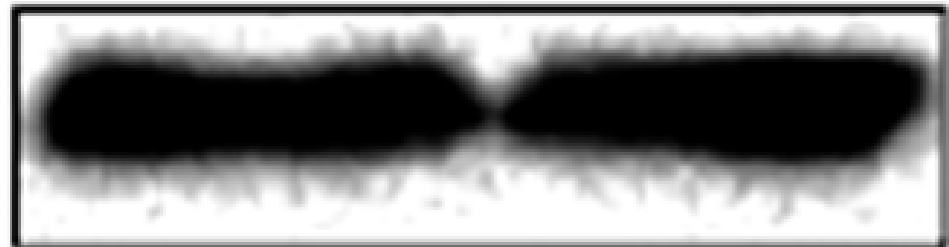



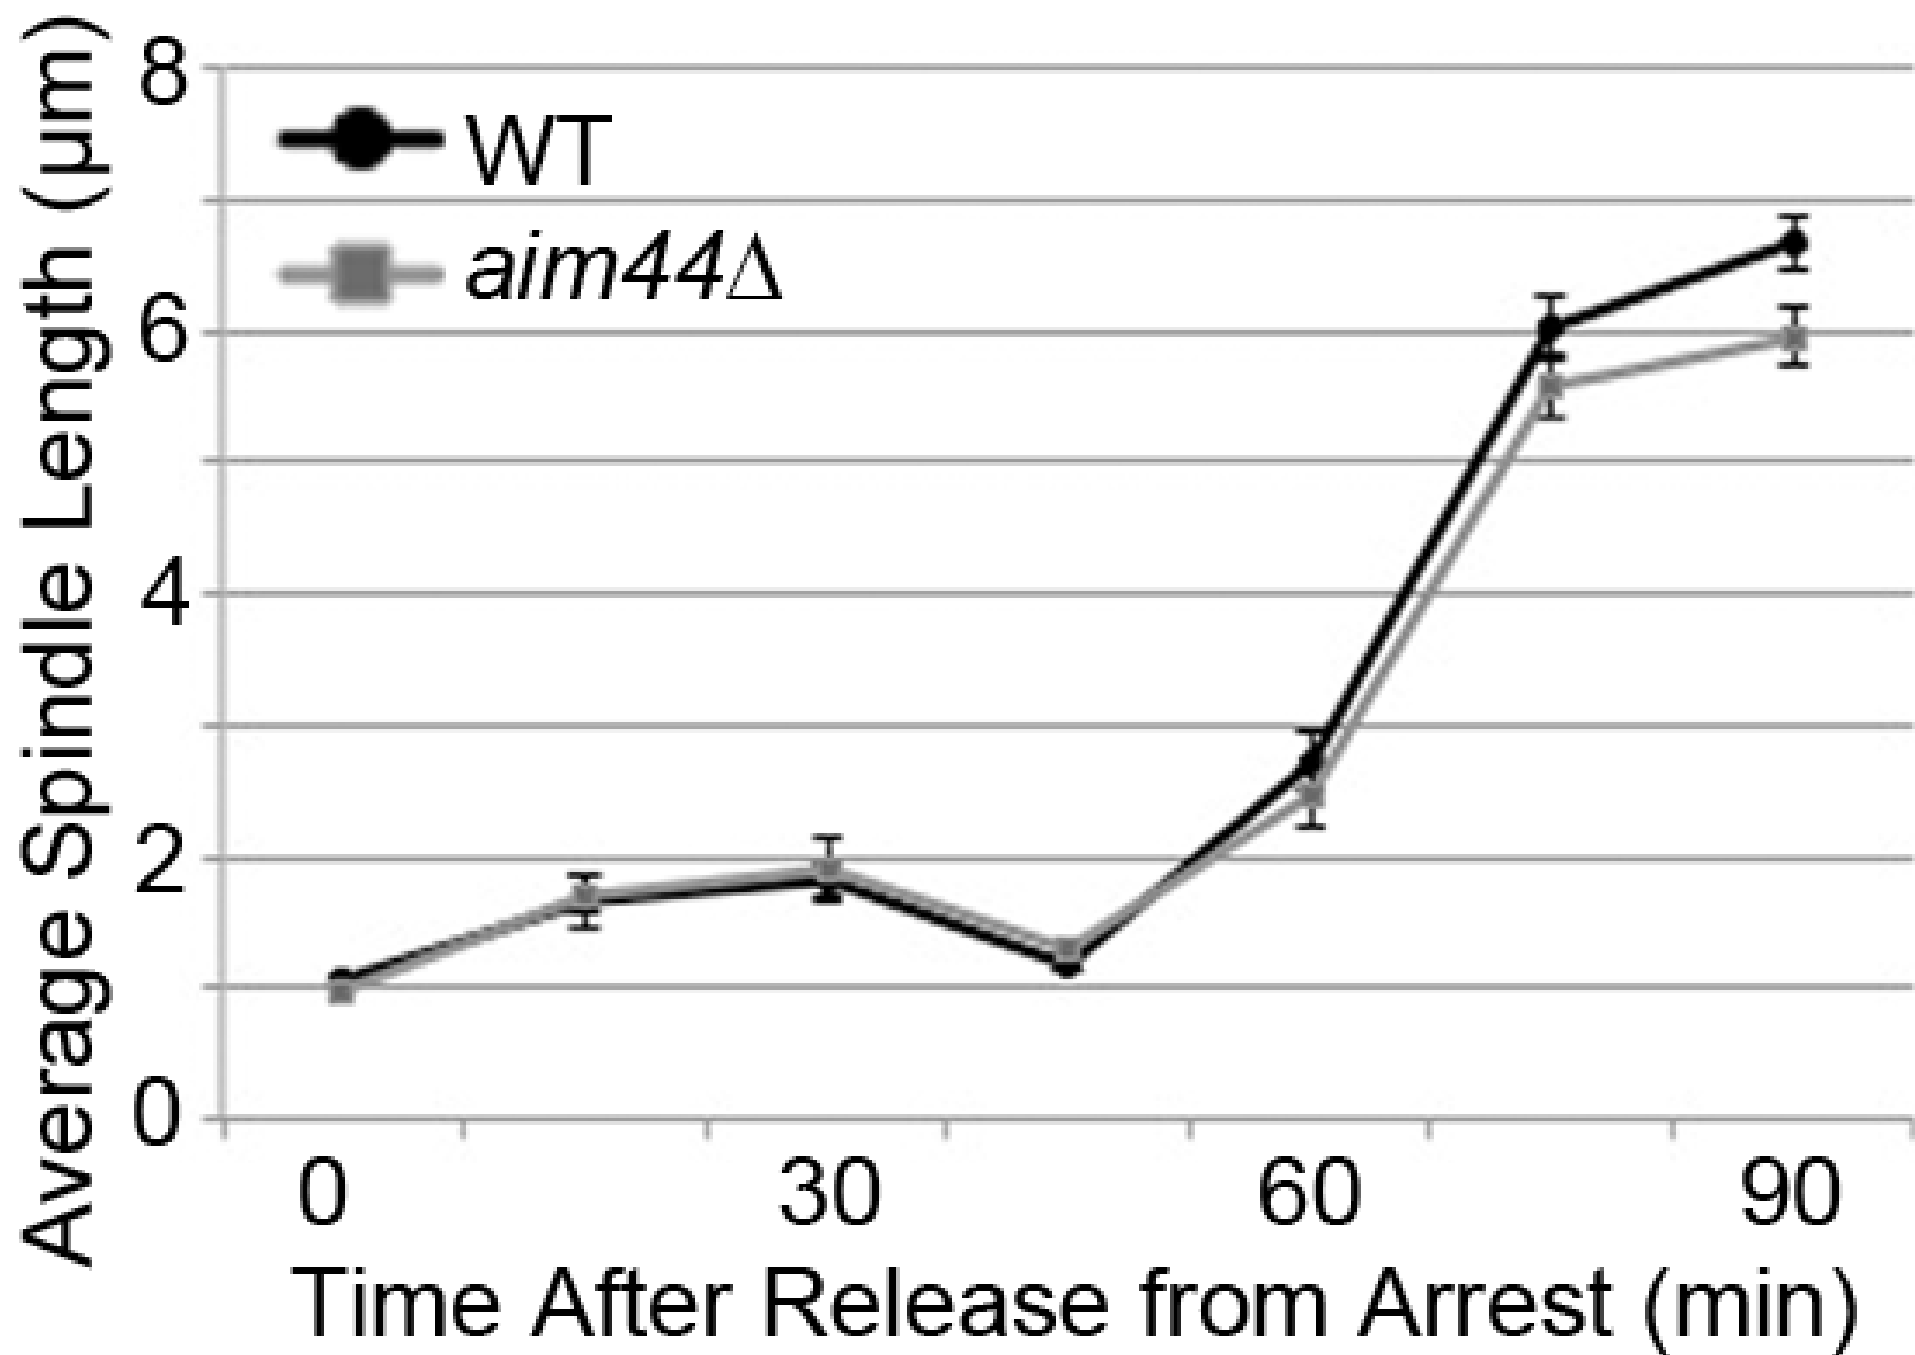

Supplement: supp_E13-06-0317v1_CombinedSupMats.pdf.pdf [file supp_E13-06-0317v1_CombinedSupMats.pdf.pdf]
